# Supplementary material
Source: PubMed Central journal article supplement (PMC2701028)
Supplement: 0812367106_0812367106SI.pdf [file 0812367106_0812367106SI.pdf]

# Supporting Information

Shih et al. 10.1073/pnas.0812367106

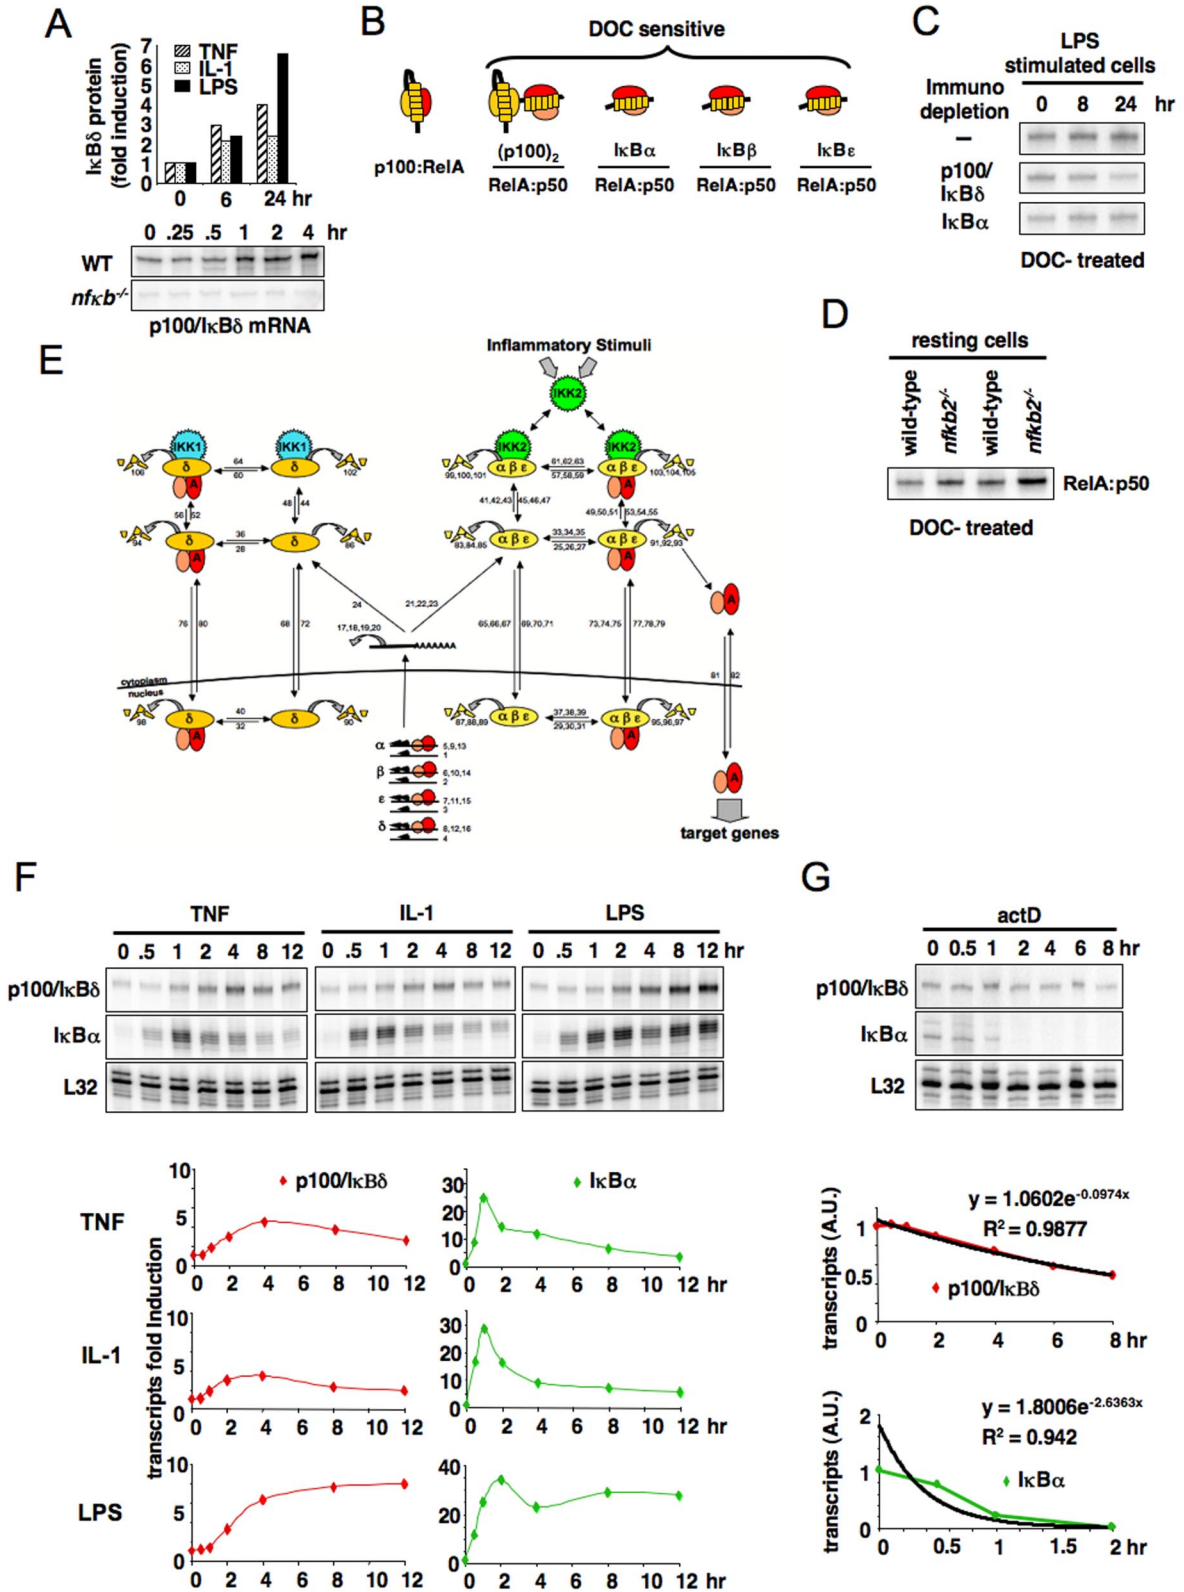











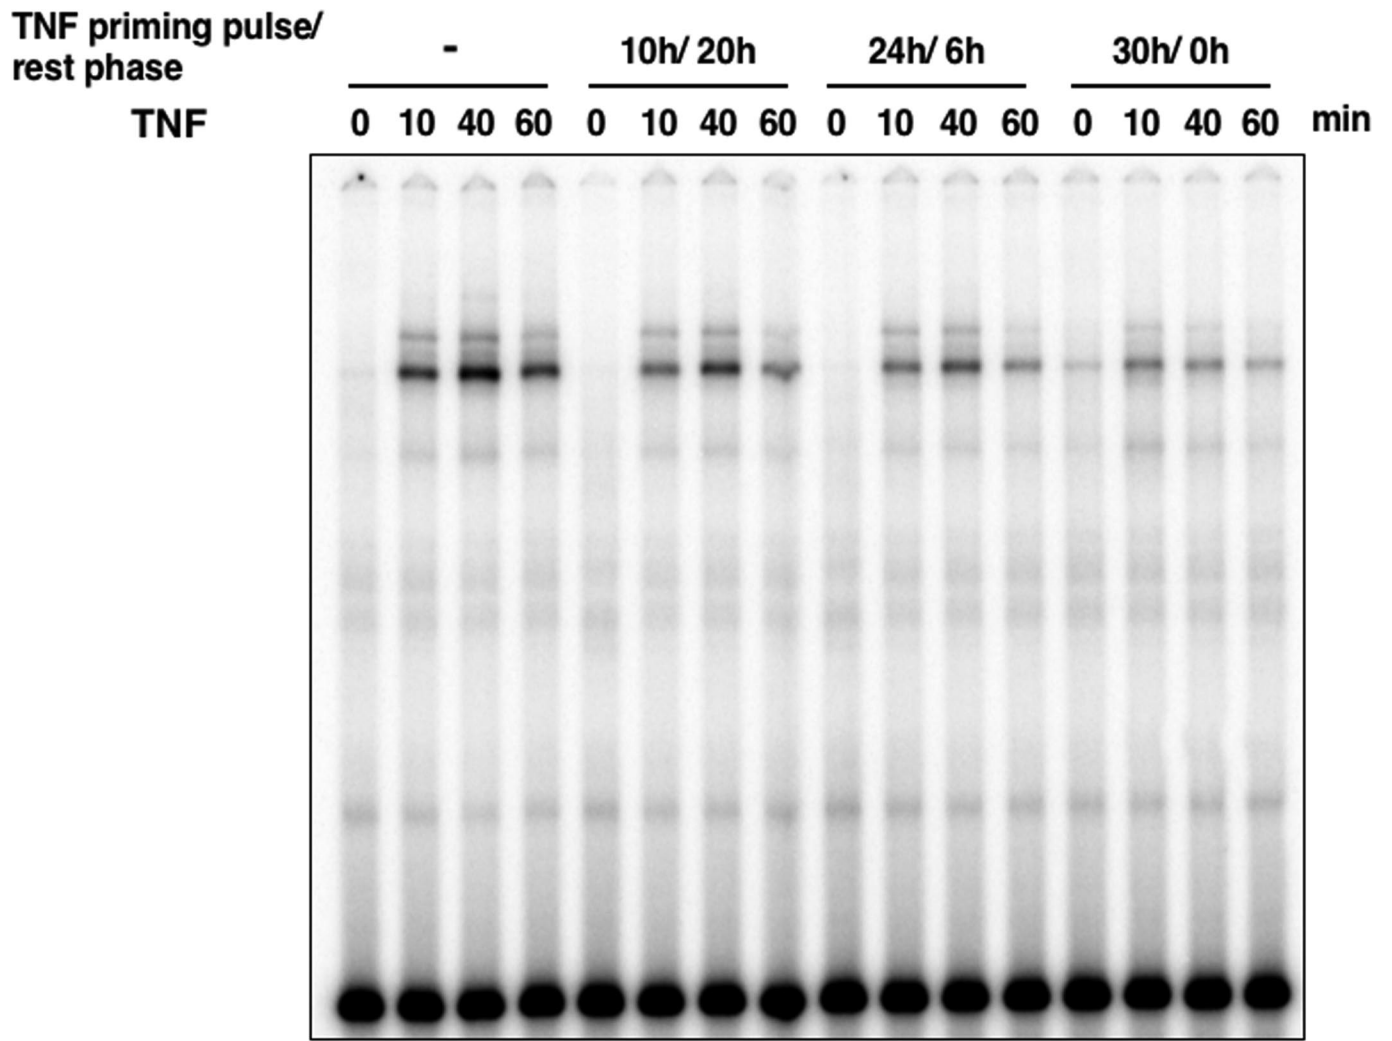

**Fig. S6.** Analysis of NF- $\kappa$ B activation in wild-type MEFs primed with TNF and rested for different periods of time as indicated. NF- $\kappa$ B activities in response to TNF were compared between naïve and primed cells by EMSA.





Table S1. Model species and initial concentrations

|    | Model Species                               | Nomenclature                                      | Initial $\mu\text{M}$ | Location  |
|----|---------------------------------------------|---------------------------------------------------|-----------------------|-----------|
| 1  | I $\kappa$ B $\alpha$                       | I $\kappa$ B $\alpha$                             | 0                     | Cytoplasm |
| 2  | I $\kappa$ B $\alpha$                       | I $\kappa$ B $\alpha$ n                           | 0                     | Nucleus   |
| 3  | I $\kappa$ B $\alpha$ :NF- $\kappa$ B       | I $\kappa$ B $\alpha$ NF $\kappa$ B               | 0                     | Cytoplasm |
| 4  | I $\kappa$ B $\alpha$ :NF- $\kappa$ B       | I $\kappa$ B $\alpha$ NF $\kappa$ Bn              | 0                     | Nucleus   |
| 5  | I $\kappa$ B $\alpha$ :IKK                  | I $\kappa$ B $\alpha$ IKK                         | 0                     | Cytoplasm |
| 6  | I $\kappa$ B $\alpha$ :IKK:NF- $\kappa$ B   | I $\kappa$ B $\alpha$ I $\kappa$ KNF $\kappa$ B   | 0                     | Cytoplasm |
| 7  | I $\kappa$ B $\alpha$ mRNA                  | I $\kappa$ B $\alpha$ t                           | 0                     | Cytoplasm |
| 8  | I $\kappa$ B $\beta$                        | I $\kappa$ B $\beta$                              | 0                     | Cytoplasm |
| 9  | I $\kappa$ B $\beta$                        | I $\kappa$ B $\beta$ n                            | 0                     | Nucleus   |
| 10 | I $\kappa$ B $\beta$ :NF- $\kappa$ B        | I $\kappa$ B $\beta$ NF $\kappa$ B                | 0                     | Cytoplasm |
| 11 | I $\kappa$ B $\beta$ :NF- $\kappa$ B        | I $\kappa$ B $\beta$ NF $\kappa$ Bn               | 0                     | Nucleus   |
| 12 | I $\kappa$ B $\beta$ :IKK                   | I $\kappa$ B $\beta$ IKK                          | 0                     | Cytoplasm |
| 13 | I $\kappa$ B $\beta$ :IKK:NF- $\kappa$ B    | I $\kappa$ B $\beta$ I $\kappa$ KNF $\kappa$ B    | 0                     | Cytoplasm |
| 14 | I $\kappa$ B $\beta$ mRNA                   | I $\kappa$ B $\beta$ t                            | 0                     | Cytoplasm |
| 15 | I $\kappa$ B $\epsilon$                     | I $\kappa$ B $\epsilon$                           | 0                     | Cytoplasm |
| 16 | I $\kappa$ B $\epsilon$                     | I $\kappa$ B $\epsilon$ n                         | 0                     | Nucleus   |
| 17 | I $\kappa$ B $\epsilon$ :NF- $\kappa$ B     | I $\kappa$ B $\epsilon$ NF $\kappa$ B             | 0                     | Cytoplasm |
| 18 | I $\kappa$ B $\epsilon$ :NF- $\kappa$ B     | I $\kappa$ B $\epsilon$ NF $\kappa$ Bn            | 0                     | Nucleus   |
| 19 | I $\kappa$ B $\epsilon$ :IKK                | I $\kappa$ B $\epsilon$ IKK                       | 0                     | Cytoplasm |
| 20 | I $\kappa$ B $\epsilon$ :IKK:NF- $\kappa$ B | I $\kappa$ B $\epsilon$ I $\kappa$ KNF $\kappa$ B | 0                     | Cytoplasm |
| 21 | I $\kappa$ B $\epsilon$ mRNA                | I $\kappa$ B $\epsilon$ t                         | 0                     | Cytoplasm |
| 22 | IKK2                                        | IKK                                               | 0.1                   | Cytoplasm |
| 23 | NF- $\kappa$ B                              | NF $\kappa$ B                                     | 0                     | Cytoplasm |
| 24 | NF- $\kappa$ B                              | NF $\kappa$ Bn                                    | 0.125                 | Nucleus   |
| 25 | IKK1                                        | IKK1                                              | 0.1                   | Cytoplasm |
| 26 | I $\kappa$ B $\delta$                       | I $\kappa$ B $\delta$                             | 0                     | Cytoplasm |
| 27 | I $\kappa$ B $\delta$                       | I $\kappa$ B $\delta$ n                           | 0                     | Nucleus   |
| 28 | I $\kappa$ B $\delta$ :NF- $\kappa$ B       | I $\kappa$ B $\delta$ NF $\kappa$ B               | 0                     | Cytoplasm |
| 29 | I $\kappa$ B $\delta$ :NF- $\kappa$ B       | I $\kappa$ B $\delta$ NF $\kappa$ Bn              | 0                     | Nucleus   |
| 30 | I $\kappa$ B $\delta$ :IKK1                 | I $\kappa$ B $\delta$ IKK1                        | 0                     | Cytoplasm |
| 31 | I $\kappa$ B $\delta$ :IKK1:NF- $\kappa$ B  | I $\kappa$ B $\delta$ I $\kappa$ KNF $\kappa$ B   | 0                     | Cytoplasm |
| 32 | I $\kappa$ B $\delta$ mRNA                  | I $\kappa$ B $\delta$ t                           | 0                     | Cytoplasm |

There are 32 species included in the model. Each is represented in the model with a unique name (nomenclature) and is given an initial concentration and cellular localization. The total amounts of NF- $\kappa$ B, IKK1, and IKK2 are conserved throughout the simulation (the sums of free, bound, active, and inactive forms in the cytoplasm and nucleus do not change). The initial concentrations of the remaining species are set to zero.

Table S2. Model parameters and biochemical rate constants

| No.                                                          | Reaction                                                                       | Parameter value                               | Category     | Location  | Source of parameter value                                                                                                                                                                     |
|--------------------------------------------------------------|--------------------------------------------------------------------------------|-----------------------------------------------|--------------|-----------|-----------------------------------------------------------------------------------------------------------------------------------------------------------------------------------------------|
| I $\kappa$ B mRNA and protein synthesis reactions            |                                                                                |                                               |              |           |                                                                                                                                                                                               |
| 1                                                            | $\Rightarrow$ I $\kappa$ Bat (constitutive)                                    | 2 E-4 min <sup>-1</sup>                       | RNA synth.   | —         | mRNA synthesis parameters were derived from mRNA and Protein expression profiles measured by RNase Protection Assays (RPA) and Western Blots in wild type and NF- $\kappa$ B-deficient cells. |
| 2                                                            | $\Rightarrow$ I $\kappa$ Bbt (constitutive)                                    | 1 E-5 min <sup>-1</sup>                       | RNA synth.   | —         | Refer to no. 1                                                                                                                                                                                |
| 3                                                            | $\Rightarrow$ I $\kappa$ Bet (constitutive)                                    | 3 E-6 min <sup>-1</sup>                       | RNA synth.   | —         | Refer to no. 1                                                                                                                                                                                |
| 4                                                            | $\Rightarrow$ I $\kappa$ Bdt (constitutive)                                    | 1 E-7 min <sup>-1</sup>                       | RNA synth.   | —         | Refer to no. 1                                                                                                                                                                                |
| 5                                                            | $\Rightarrow$ I $\kappa$ Bat (induced by NF $\kappa$ Bn)                       | 6 $\mu$ M <sup>-2</sup> min <sup>-1</sup>     | RNA synth.   | —         | 1                                                                                                                                                                                             |
| 9                                                            |                                                                                | Hill Coefficient: 3.0                         |              |           | 1                                                                                                                                                                                             |
| 13                                                           |                                                                                | Delay: 0 min                                  |              |           | 2                                                                                                                                                                                             |
| 6                                                            | $\Rightarrow$ I $\kappa$ Bbt (induced by NF $\kappa$ Bn)                       | 0.25 $\mu$ M <sup>-2</sup> min <sup>-1</sup>  | RNA synth.   | —         | 2                                                                                                                                                                                             |
| 10                                                           |                                                                                | Hill Coefficient: 3.0                         |              |           | 1                                                                                                                                                                                             |
| 14                                                           |                                                                                | Delay: 37 min                                 |              |           | 2 and unpublished results                                                                                                                                                                     |
| 7                                                            | $\Rightarrow$ I $\kappa$ Bet (induced by NF $\kappa$ Bn)                       | 0.5 $\mu$ M <sup>-2</sup> min <sup>-1</sup>   | RNA synth.   | —         | 2                                                                                                                                                                                             |
| 11                                                           |                                                                                | Hill Coefficient: 3.0                         |              |           | 1                                                                                                                                                                                             |
| 15                                                           |                                                                                | Delay: 37 min                                 |              |           | 2 and unpublished results                                                                                                                                                                     |
| 8                                                            | $\Rightarrow$ I $\kappa$ Bdt (induced by NF $\kappa$ Bn)                       | 0.025 $\mu$ M <sup>-2</sup> min <sup>-1</sup> | RNA synth.   | —         | mRNA synthesis parameters were derived from mRNA expression measurements in response to several inflammatory stimuli (SI Fig. 1F)                                                             |
| 12                                                           |                                                                                | Hill Coefficient: 3.0                         |              |           |                                                                                                                                                                                               |
| 16                                                           |                                                                                | Delay: 90 min                                 |              |           |                                                                                                                                                                                               |
| 17                                                           | I $\kappa$ Bat $\Rightarrow$                                                   | 0.035 min <sup>-1</sup>                       | RNA deg.     | Cytoplasm | mRNA half-lives were determined by treating cells with Actinomycin-D and tracking the decay of the mRNA by RPA (SI Fig. 1G)                                                                   |
| 18                                                           | I $\kappa$ Bbt $\Rightarrow$                                                   | 3 E-3 min <sup>-1</sup>                       | RNA deg.     | Cytoplasm | Refer to no. 17                                                                                                                                                                               |
| 19                                                           | I $\kappa$ Bet $\Rightarrow$                                                   | 4 E-3 min <sup>-1</sup>                       | RNA deg.     | Cytoplasm | Refer to no. 17                                                                                                                                                                               |
| 20                                                           | I $\kappa$ Bdt $\Rightarrow$                                                   | 2 E-3 min <sup>-1</sup>                       | RNA deg.     | Cytoplasm | Refer to no. 17                                                                                                                                                                               |
| 21                                                           | $\Rightarrow$ I $\kappa$ Ba                                                    | 0.25 min <sup>-1</sup>                        | Prot. synth. | Cytoplasm | 1                                                                                                                                                                                             |
| 22                                                           | $\Rightarrow$ I $\kappa$ Bb                                                    | 0.25 min <sup>-1</sup>                        | Prot. synth. | Cytoplasm | 1                                                                                                                                                                                             |
| 23                                                           | $\Rightarrow$ I $\kappa$ Be                                                    | 0.25 min <sup>-1</sup>                        | Prot. synth. | Cytoplasm | 1                                                                                                                                                                                             |
| 24                                                           | $\Rightarrow$ I $\kappa$ Bd                                                    | 0.25 min <sup>-1</sup>                        | Prot. synth. | Cytoplasm | Assumed to be the same as for canonical I $\kappa$ Bs                                                                                                                                         |
| I $\kappa$ B:IKK:NFKB association and dissociation reactions |                                                                                |                                               |              |           |                                                                                                                                                                                               |
| 25                                                           | I $\kappa$ Ba + NF $\kappa$ B $\Rightarrow$ I $\kappa$ BaNF $\kappa$ B         | 30 $\mu$ M <sup>-1</sup> min <sup>-1</sup>    | Association  | Cytoplasm | 1                                                                                                                                                                                             |
| 26                                                           | I $\kappa$ Bb + NF $\kappa$ B $\Rightarrow$ I $\kappa$ BbNF $\kappa$ B         | 30 $\mu$ M <sup>-1</sup> min <sup>-1</sup>    | Association  | Cytoplasm | 1                                                                                                                                                                                             |
| 27                                                           | I $\kappa$ Be + NF $\kappa$ B $\Rightarrow$ I $\kappa$ BeNF $\kappa$ B         | 30 $\mu$ M <sup>-1</sup> min <sup>-1</sup>    | Association  | Cytoplasm | 1                                                                                                                                                                                             |
| 28                                                           | I $\kappa$ Bd + NF $\kappa$ B $\Rightarrow$ I $\kappa$ BdNF $\kappa$ B         | 30 $\mu$ M <sup>-1</sup> min <sup>-1</sup>    | Association  | Cytoplasm | Assumed to be the same as for canonical I $\kappa$ Bs                                                                                                                                         |
| 29                                                           | I $\kappa$ Ban + NF $\kappa$ Bn $\Rightarrow$ I $\kappa$ BanNF $\kappa$ Bn     | 30 $\mu$ M <sup>-1</sup> min <sup>-1</sup>    | Association  | Nucleus   | 1                                                                                                                                                                                             |
| 30                                                           | I $\kappa$ Bbn + NF $\kappa$ Bn $\Rightarrow$ I $\kappa$ BbnNF $\kappa$ Bn     | 30 $\mu$ M <sup>-1</sup> min <sup>-1</sup>    | Association  | Nucleus   | 1                                                                                                                                                                                             |
| 31                                                           | I $\kappa$ Ben + NF $\kappa$ Bn $\Rightarrow$ I $\kappa$ BenNF $\kappa$ Bn     | 30 $\mu$ M <sup>-1</sup> min <sup>-1</sup>    | Association  | Nucleus   | 1                                                                                                                                                                                             |
| 32                                                           | I $\kappa$ Bdn + NF $\kappa$ Bn $\Rightarrow$ I $\kappa$ BdnNF $\kappa$ Bn     | 30 $\mu$ M <sup>-1</sup> min <sup>-1</sup>    | Association  | Nucleus   | Assumed to be the same as for canonical I $\kappa$ Bs                                                                                                                                         |
| 33                                                           | I $\kappa$ BaNF $\kappa$ B $\Rightarrow$ I $\kappa$ Ba + NF $\kappa$ B         | 6E-5 min <sup>-1</sup>                        | Dissociation | Cytoplasm | 1                                                                                                                                                                                             |
| 34                                                           | I $\kappa$ BbNF $\kappa$ B $\Rightarrow$ I $\kappa$ Bb + NF $\kappa$ B         | 6E-5 min <sup>-1</sup>                        | Dissociation | Cytoplasm | 1                                                                                                                                                                                             |
| 35                                                           | I $\kappa$ BeNF $\kappa$ B $\Rightarrow$ I $\kappa$ Be + NF $\kappa$ B         | 6E-5 min <sup>-1</sup>                        | Dissociation | Cytoplasm | 1                                                                                                                                                                                             |
| 36                                                           | I $\kappa$ BdNF $\kappa$ B $\Rightarrow$ I $\kappa$ Bd + NF $\kappa$ B         | 6E-5 min <sup>-1</sup>                        | Dissociation | Cytoplasm | Assumed to be the same as for canonical I $\kappa$ Bs                                                                                                                                         |
| 37                                                           | I $\kappa$ BanNF $\kappa$ Bn $\Rightarrow$ I $\kappa$ Ban + NF $\kappa$ Bn     | 6E-5 min <sup>-1</sup>                        | Dissociation | Nucleus   | 1                                                                                                                                                                                             |
| 38                                                           | I $\kappa$ BbnNF $\kappa$ Bn $\Rightarrow$ I $\kappa$ Bbn + NF $\kappa$ Bn     | 6E-5 min <sup>-1</sup>                        | Dissociation | Nucleus   | 1                                                                                                                                                                                             |
| 39                                                           | I $\kappa$ BenNF $\kappa$ Bn $\Rightarrow$ I $\kappa$ Ben + NF $\kappa$ Bn     | 6E-5 min <sup>-1</sup>                        | Dissociation | Nucleus   | 1                                                                                                                                                                                             |
| 40                                                           | I $\kappa$ BdnNF $\kappa$ Bn $\Rightarrow$ I $\kappa$ Bdn + NF $\kappa$ Bn     | 6E-5 min <sup>-1</sup>                        | Dissociation | Nucleus   | Assumed to be the same as for canonical I $\kappa$ Bs                                                                                                                                         |
| 41                                                           | I $\kappa$ Ba + IKK2 $\Rightarrow$ I $\kappa$ BaIKK2                           | 1.35 $\mu$ M <sup>-1</sup> min <sup>-1</sup>  | Association  | Cytoplasm | 1                                                                                                                                                                                             |
| 42                                                           | I $\kappa$ Bb + IKK2 $\Rightarrow$ I $\kappa$ BbIKK2                           | 0.36 $\mu$ M <sup>-1</sup> min <sup>-1</sup>  | Association  | Cytoplasm | 1                                                                                                                                                                                             |
| 43                                                           | I $\kappa$ Be + IKK2 $\Rightarrow$ I $\kappa$ BeIKK2                           | 0.54 $\mu$ M <sup>-1</sup> min <sup>-1</sup>  | Association  | Cytoplasm | 1                                                                                                                                                                                             |
| 44                                                           | I $\kappa$ Bd + IKK1 $\Rightarrow$ I $\kappa$ BdIKK1                           | 0.54 $\mu$ M <sup>-1</sup> min <sup>-1</sup>  | Association  | Cytoplasm | Assumed to be the same as for I $\kappa$ Be but pertaining to IKK1                                                                                                                            |
| 45                                                           | I $\kappa$ BaIKK2 $\Rightarrow$ I $\kappa$ Ba + IKK2                           | 0.075 min <sup>-1</sup>                       | Dissociation | Cytoplasm | 1                                                                                                                                                                                             |
| 46                                                           | I $\kappa$ BbIKK2 $\Rightarrow$ I $\kappa$ Bb + IKK2                           | 0.105 min <sup>-1</sup>                       | Dissociation | Cytoplasm | 1                                                                                                                                                                                             |
| 47                                                           | I $\kappa$ BeIKK2 $\Rightarrow$ I $\kappa$ Be + IKK2                           | 0.105 min <sup>-1</sup>                       | Dissociation | Cytoplasm | 1                                                                                                                                                                                             |
| 48                                                           | I $\kappa$ BdIKK1 $\Rightarrow$ I $\kappa$ Bd + IKK1                           | 0.105 min <sup>-1</sup>                       | Dissociation | Cytoplasm | Assumed to be the same as for I $\kappa$ Be but pertaining to IKK1                                                                                                                            |
| 49                                                           | I $\kappa$ BaNF $\kappa$ B + IKK2 $\Rightarrow$ I $\kappa$ BaIKK2NF $\kappa$ B | 11.1 $\mu$ M <sup>-1</sup> min <sup>-1</sup>  | Association  | Cytoplasm | 1                                                                                                                                                                                             |
| 50                                                           | I $\kappa$ BbNF $\kappa$ B + IKK2 $\Rightarrow$ I $\kappa$ BbIKK2NF $\kappa$ B | 2.88 $\mu$ M <sup>-1</sup> min <sup>-1</sup>  | Association  | Cytoplasm | 1                                                                                                                                                                                             |
| 51                                                           | I $\kappa$ BeNF $\kappa$ B + IKK2 $\Rightarrow$ I $\kappa$ BeIKK2NF $\kappa$ B | 4.2 $\mu$ M <sup>-1</sup> min <sup>-1</sup>   | Association  | Cytoplasm | 1                                                                                                                                                                                             |
| 52                                                           | I $\kappa$ BdNF $\kappa$ B + IKK1 $\Rightarrow$ I $\kappa$ BdIKK1NF $\kappa$ B | 4.2 $\mu$ M <sup>-1</sup> min <sup>-1</sup>   | Association  | Cytoplasm | Assumed to be the same as for I $\kappa$ Be but pertaining to IKK1                                                                                                                            |
| 53                                                           | I $\kappa$ BaIKK2NF $\kappa$ B $\Rightarrow$ I $\kappa$ BaNF $\kappa$ B + IKK2 | 0.075 min <sup>-1</sup>                       | Dissociation | Cytoplasm | 1                                                                                                                                                                                             |
| 54                                                           | I $\kappa$ BbIKK2NF $\kappa$ B $\Rightarrow$ I $\kappa$ BbNF $\kappa$ B + IKK2 | 0.105 min <sup>-1</sup>                       | Dissociation | Cytoplasm | 1                                                                                                                                                                                             |

| No.                                          | Reaction                                                        | Parameter value                        | Category     | Location  | Source of parameter value                                                           |
|----------------------------------------------|-----------------------------------------------------------------|----------------------------------------|--------------|-----------|-------------------------------------------------------------------------------------|
| 55                                           | $\text{IkBeIKK2NFkB} \Rightarrow \text{IkBeNFkB} + \text{IKK2}$ | $0.105 \text{ min}^{-1}$               | Dissociation | Cytoplasm | 1                                                                                   |
| 56                                           | $\text{IkBdIKK1NFkB} \Rightarrow \text{IkBdNFkB} + \text{IKK1}$ | $0.105 \text{ min}^{-1}$               | Dissociation | Cytoplasm | Assumed to be the same as for IkBe but pertaining to IKK1                           |
| 57                                           | $\text{IkBaIKK2} + \text{NFkB} \Rightarrow \text{IkBaIKK2NFkB}$ | $30 \mu\text{M}^{-1} \text{ min}^{-1}$ | Association  | Cytoplasm | 1                                                                                   |
| 58                                           | $\text{IkBbIKK2} + \text{NFkB} \Rightarrow \text{IkBbIKK2NFkB}$ | $30 \mu\text{M}^{-1} \text{ min}^{-1}$ | Association  | Cytoplasm | 1                                                                                   |
| 59                                           | $\text{IkBeIKK2} + \text{NFkB} \Rightarrow \text{IkBeIKK2NFkB}$ | $30 \mu\text{M}^{-1} \text{ min}^{-1}$ | Association  | Cytoplasm | 1                                                                                   |
| 60                                           | $\text{IkBdIKK1} + \text{NFkB} \Rightarrow \text{IkBdIKK1NFkB}$ | $30 \mu\text{M}^{-1} \text{ min}^{-1}$ | Association  | Cytoplasm | Assumed to be the same as for canonical IkBs                                        |
| 61                                           | $\text{IkBaIKK2NFkB} \Rightarrow \text{IkBaIKK2} + \text{NFkB}$ | $6\text{E-}5 \text{ min}^{-1}$         | Dissociation | Cytoplasm | 1                                                                                   |
| 62                                           | $\text{IkBbIKK2NFkB} \Rightarrow \text{IkBbIKK2} + \text{NFkB}$ | $6\text{E-}5 \text{ min}^{-1}$         | Dissociation | Cytoplasm | 1                                                                                   |
| 63                                           | $\text{IkBeIKK2NFkB} \Rightarrow \text{IkBeIKK2} + \text{NFkB}$ | $6\text{E-}5 \text{ min}^{-1}$         | Dissociation | Cytoplasm | 1                                                                                   |
| 64                                           | $\text{IkBdIKK1NFkB} \Rightarrow \text{IkBdIKK1} + \text{NFkB}$ | $6\text{E-}5 \text{ min}^{-1}$         | Dissociation | Cytoplasm | Assumed to be the same as for canonical IkBs                                        |
| IkB and NFkB cellular localization reactions |                                                                 |                                        |              |           |                                                                                     |
| 65                                           | $\text{IkBa} \Rightarrow \text{IkBan}$                          | $0.09 \text{ min}^{-1}$                | Import       | —         | 1                                                                                   |
| 66                                           | $\text{IkBb} \Rightarrow \text{IkBbn}$                          | $0.009 \text{ min}^{-1}$               | Import       | —         | 1                                                                                   |
| 67                                           | $\text{IkBe} \Rightarrow \text{IkBen}$                          | $0.045 \text{ min}^{-1}$               | Import       | —         | 1                                                                                   |
| 68                                           | $\text{IkBd} \Rightarrow \text{IkBdn}$                          | $0.045 \text{ min}^{-1}$               | Import       | —         | Assumed to be the same as for IkBe                                                  |
| 69                                           | $\text{IkBan} \Rightarrow \text{IkBa}$                          | $0.012 \text{ min}^{-1}$               | Export       | —         | 1                                                                                   |
| 70                                           | $\text{IkBbn} \Rightarrow \text{IkBb}$                          | $0.012 \text{ min}^{-1}$               | Export       | —         | 1                                                                                   |
| 71                                           | $\text{IkBen} \Rightarrow \text{IkBe}$                          | $0.012 \text{ min}^{-1}$               | Export       | —         | 1                                                                                   |
| 72                                           | $\text{IkBdn} \Rightarrow \text{IkBd}$                          | $0.012 \text{ min}^{-1}$               | Export       | —         | Assumed to be the same as for canonical IkBs                                        |
| 73                                           | $\text{IkBaNFkB} \Rightarrow \text{IkBaNFkBn}$                  | $0.276 \text{ min}^{-1}$               | Import       | —         | 1                                                                                   |
| 74                                           | $\text{IkBbNFkB} \Rightarrow \text{IkBbNFkBn}$                  | $0.0276 \text{ min}^{-1}$              | Import       | —         | 1                                                                                   |
| 75                                           | $\text{IkBeNFkB} \Rightarrow \text{IkBeNFkBn}$                  | $0.138 \text{ min}^{-1}$               | Import       | —         | 1                                                                                   |
| 76                                           | $\text{IkBdNFkB} \Rightarrow \text{IkBdNFkBn}$                  | $0.276 \text{ min}^{-1}$               | Import       | —         | Assumed to be the same as for IkBa                                                  |
| 77                                           | $\text{IkBaNFkBn} \Rightarrow \text{IkBaNFkB}$                  | $0.828 \text{ min}^{-1}$               | Export       | —         | 1                                                                                   |
| 78                                           | $\text{IkBbNFkBn} \Rightarrow \text{IkBbNFkB}$                  | $0.414 \text{ min}^{-1}$               | Export       | —         | 1                                                                                   |
| 79                                           | $\text{IkBeNFkBn} \Rightarrow \text{IkBeNFkB}$                  | $0.414 \text{ min}^{-1}$               | Export       | —         | 1                                                                                   |
| 80                                           | $\text{IkBdNFkBn} \Rightarrow \text{IkBdNFkB}$                  | $0.414 \text{ min}^{-1}$               | Export       | —         | Assumed to be the same as for canonical IkBs                                        |
| 81                                           | $\text{NFkB} \Rightarrow \text{NFkBn}$                          | $5.4 \text{ min}^{-1}$                 | Import       | —         | 1                                                                                   |
| 82                                           | $\text{NFkBn} \Rightarrow \text{NFkB}$                          | $0.0048 \text{ min}^{-1}$              | Export       | —         | 1                                                                                   |
| IkB protein degradation reactions            |                                                                 |                                        |              |           |                                                                                     |
| 83                                           | $\text{IkBa} \Rightarrow$                                       | $0.12 \text{ min}^{-1}$                | Prot. deg.   | Cytoplasm | 3                                                                                   |
| 84                                           | $\text{IkBb} \Rightarrow$                                       | $0.18 \text{ min}^{-1}$                | Prot. deg.   | Cytoplasm | 3                                                                                   |
| 85                                           | $\text{IkBe} \Rightarrow$                                       | $0.18 \text{ min}^{-1}$                | Prot. deg.   | Cytoplasm | 3                                                                                   |
| 86                                           | $\text{IkBd} \Rightarrow$                                       | $1.4\text{E-}3 \text{ min}^{-1}$       | Prot. deg.   | Cytoplasm | The IkBd half-life was measured by quantitative Western blot (unpublished results). |
| 87                                           | $\text{IkBan} \Rightarrow$                                      | $0.12 \text{ min}^{-1}$                | Prot. deg.   | Nucleus   | 3                                                                                   |
| 88                                           | $\text{IkBbn} \Rightarrow$                                      | $0.18 \text{ min}^{-1}$                | Prot. deg.   | Nucleus   | 3                                                                                   |
| 89                                           | $\text{IkBen} \Rightarrow$                                      | $0.18 \text{ min}^{-1}$                | Prot. deg.   | Nucleus   | 3                                                                                   |
| 90                                           | $\text{IkBdn} \Rightarrow$                                      | $1.4\text{E-}3 \text{ min}^{-1}$       | Prot. deg.   | Nucleus   | Refer to #86                                                                        |
| 91                                           | $\text{IkBaNFkB} \Rightarrow \text{NFkB}$                       | $6\text{E-}5 \text{ min}^{-1}$         | Prot. deg.   | Cytoplasm | 3                                                                                   |
| 92                                           | $\text{IkBbNFkB} \Rightarrow \text{NFkB}$                       | $6\text{E-}5 \text{ min}^{-1}$         | Prot. deg.   | Cytoplasm | 3                                                                                   |
| 93                                           | $\text{IkBeNFkB} \Rightarrow \text{NFkB}$                       | $6\text{E-}5 \text{ min}^{-1}$         | Prot. deg.   | Cytoplasm | 3                                                                                   |
| 94                                           | $\text{IkBdNFkB} \Rightarrow \text{NFkB}$                       | $6\text{E-}5 \text{ min}^{-1}$         | Prot. deg.   | Cytoplasm | Assumed to be the same as for canonical IkBs                                        |
| 95                                           | $\text{IkBaNFkBn} \Rightarrow \text{NFkBn}$                     | $6\text{E-}5 \text{ min}^{-1}$         | Prot. deg.   | Nucleus   | 3                                                                                   |
| 96                                           | $\text{IkBbNFkBn} \Rightarrow \text{NFkBn}$                     | $6\text{E-}5 \text{ min}^{-1}$         | Prot. deg.   | Nucleus   | 3                                                                                   |
| 97                                           | $\text{IkBeNFkBn} \Rightarrow \text{NFkBn}$                     | $6\text{E-}5 \text{ min}^{-1}$         | Prot. deg.   | Nucleus   | 3                                                                                   |
| 98                                           | $\text{IkBdNFkBn} \Rightarrow \text{NFkBn}$                     | $6\text{E-}5 \text{ min}^{-1}$         | Prot. deg.   | Nucleus   | Assumed to be the same as for canonical IkBs                                        |
| 99                                           | $\text{IkBaIKK2} \Rightarrow \text{IKK2}$                       | $1.8\text{E-}3 \text{ min}^{-1}$       | Prot. deg.   | Cytoplasm | 1                                                                                   |
| 100                                          | $\text{IkBbIKK2} \Rightarrow \text{IKK2}$                       | $6\text{E-}4 \text{ min}^{-1}$         | Prot. deg.   | Cytoplasm | 1                                                                                   |
| 101                                          | $\text{IkBeIKK2} \Rightarrow \text{IKK2}$                       | $1.2\text{E-}3 \text{ min}^{-1}$       | Prot. deg.   | Cytoplasm | 1                                                                                   |
| 102                                          | $\text{IkBdIKK1} \Rightarrow \text{IKK1}$                       | $1.2\text{E-}3 \text{ min}^{-1}$       | Prot. deg.   | Cytoplasm | Assumed to be the same as for IkBe                                                  |
| 103                                          | $\text{IkBaIKK2NFkB} \Rightarrow \text{IKK2} + \text{NFkB}$     | $0.36 \text{ min}^{-1}$                | Prot. deg.   | Cytoplasm | 1                                                                                   |
| 104                                          | $\text{IkBbIKK2NFkB} \Rightarrow \text{IKK2} + \text{NFkB}$     | $0.12 \text{ min}^{-1}$                | Prot. deg.   | Cytoplasm | 1                                                                                   |
| 105                                          | $\text{IkBeIKK2NFkB} \Rightarrow \text{IKK2} + \text{NFkB}$     | $0.18 \text{ min}^{-1}$                | Prot. deg.   | Cytoplasm | 1                                                                                   |
| 106                                          | $\text{IkBdIKK1NFkB} \Rightarrow \text{IKK1} + \text{NFkB}$     | $0.18 \text{ min}^{-1}$                | Prot. deg.   | Cytoplasm | Assumed to be the same as for IkBe                                                  |

Parameter identifiers (column 1 and SI Fig.1E) are related to reaction descriptions and reaction rate constants.

1. Werner SL, Barken D, Hoffmann A (2005) Stimulus specificity of gene expression programs determined by temporal control of IKK activity. *Science* 309:1857–1861.
2. Kearns JD, Basak S, Werner SL, Huang CS, Hoffmann A (2006) IkappaBepsilon provides negative feedback to control NF-kappaB oscillations, signaling dynamics, and inflammatory gene expression. *J Cell Biol* 173:659–664.
2. O’Dea EL, et al. (2007) A homeostatic model of IkappaB metabolism to control constitutive NF-kappaB activity. *Mol Syst Biol* 3:111.
